# Supplementary material for: A silent H-bond can be mutationally activated for high-affinity interaction of BMP-2 and activin type IIB receptor
Source: PubMed Central journal article supplement (PMC1802081; doi:10.1186/1472-6807-7-6), 2007-02-12
Supplement: 1472-6807-7-6-S4.pdf [file 1472-6807-7-6-S4.pdf]

**(a) Hydrogen bonding network in the type I and II ligand-receptor interface of wildtype BMP-2 bound to BMPR-IA<sub>ECD</sub> and ActR-IIB<sub>ECD</sub> (ternary complex 1:1:1)**

H-bonds between BMP-2 and BMPR-IA<sub>ECD</sub> in the ternary complex (1:1:1)  
wtBMP-2:BMPR-IA:ActR-IIB

| BMP-2                    | BMPR-IA     | Distance Å | Angle NOC <sup>a</sup> | H-bond <sup>b</sup> |
|--------------------------|-------------|------------|------------------------|---------------------|
| Ser24 <sub>A</sub> (O)   | Lys92 (NZ)  | 3.06       | 152                    | MC-SC               |
| Val26 <sub>A</sub> (O)   | Ser90 (OG)  | 2.59       | 133                    | MC-SC               |
| Trp28 <sub>A</sub> (NE1) | Asp89 (O)   | 2.79       | 136                    | SC-MC               |
| Leu51 <sub>B</sub> (N)   | Gln86 (OE1) | 2.86       | 128                    | MC-SC               |
| Leu51 <sub>B</sub> (O)   | Gln86 (NE2) | 2.98       | 135                    | MC-SC               |
| Asp53 <sub>B</sub> (N)   | Cys77 (O)   | 2.80       | 129                    | MC-MC               |
| Asp53 <sub>B</sub> (OD1) | Lys79 (NZ)  | 3.01       | 111                    | SC-SC               |
| Asp53 <sub>B</sub> (OD2) | Thr55 (OG1) | 2.61       | 132                    | SC-SC               |
| Ser69 <sub>B</sub> (O)   | Gln94 (N)   | 2.86       | 151                    | MC-MC               |
| Ser69 <sub>B</sub> (OG)  | Arg97 (NH2) | 3.07       | 92                     | SC-SC               |
| Ser72 <sub>B</sub> (OG)  | Gln94 (OE1) | 2.97       | 129                    | SC-SC               |
| Lys101 <sub>A</sub> (NZ) | Asp84 (OD2) | 2.95       | 146                    | SC-SC               |
| Tyr103 <sub>A</sub> (OH) | Asp84 (OD2) | 2.97       | 116                    | SC-SC               |

H-bonds between BMP-2 and ActR-IIB<sub>ECD</sub> in the ternary complex (1:1:1)  
wtBMP-2:BMPR-IA:ActR-IIB

| BMP-2                     | ActR-IIB    | Distance Å | Angle NOC <sup>a</sup> | H-bond <sup>b</sup> |
|---------------------------|-------------|------------|------------------------|---------------------|
| Ala86 <sub>A</sub> (N)    | Glu34 (OE2) | 3.24       | 147                    | MC-SC               |
| Ser88 <sub>A</sub> (OG)   | Leu61 (N)   | 2.82       | 131                    | SC-MC               |
| Glu96 <sub>A</sub> (O)    | Arg46 (NH2) | 2.96       | 171                    | MC-SC               |
| Glu96 <sub>A</sub> (OE1)  | Gln80 (NE2) | 3.05       | 147                    | SC-SC               |
| Glu109 <sub>A</sub> (OE2) | Lys37 (NZ)  | 2.62       | 140                    | SC-SC               |

- a) N, O, C are the donor-acceptor atoms; from general statistics this angle is  $149^\circ \pm 15^\circ$  for MC-MC hydrogen bonds and  $129^\circ \pm 18^\circ$  for SC-MC and SC-SC H-bonds;  
b) MC (main chain) and SC (side chain) donor/acceptor atoms;

**(b) Hydrogen bonding network in the type I and II ligand-receptor interface of the BMP-2 double variant L100K/N102D bound to BMPR-IA<sub>ECD</sub> and ActR-IIB<sub>ECD</sub> (ternary complex 1:2:2)**

| H-bonds between BMP-2 and BMPR-IA <sub>ECD</sub> in the ternary complex (1:2:2)                  |             |            |                        |                     |
|--------------------------------------------------------------------------------------------------|-------------|------------|------------------------|---------------------|
| BMP-2L100K/N102D:(BMPR-IA <sub>ECD</sub> ) <sub>2</sub> :(ActR-IIB <sub>ECD</sub> ) <sub>2</sub> |             |            |                        |                     |
| BMP-2                                                                                            | BMPR-IA     | Distance Å | Angle NOC <sup>a</sup> | H-bond <sup>b</sup> |
| Val26 <sub>A</sub> (O)                                                                           | Ser90 (OG)  | 2.88       | 128                    | MC-SC               |
| Trp28 <sub>A</sub> (NE1)                                                                         | Asp89 (O)   | 2.89       | 135                    | SC-MC               |
| Leu51 <sub>B</sub> (N)                                                                           | Gln86 (OE1) | 2.83       | 123                    | MC-SC               |
| Leu51 <sub>B</sub> (O)                                                                           | Gln86 (NE2) | 3.00       | 132                    | MC-SC               |
| Asp53 <sub>B</sub> (N)                                                                           | Cys77 (O)   | 2.90       | 124                    | MC-MC               |
| Asp53 <sub>B</sub> (OD2)                                                                         | Thr55 (OG1) | 2.80       | 125                    | SC-SC               |
| Asn59 <sub>B</sub> (N)                                                                           | Glu81 (OE2) | 3.00       | 127                    | MC-SC               |
| Asn59 <sub>B</sub> (OD1)                                                                         | Gly82 (N)   | 3.09       | 147                    | SC-MC               |
| Ser69 <sub>B</sub> (O)                                                                           | Gln94 (N)   | 2.87       | 148                    | MC-MC               |
| Ser69 <sub>B</sub> (OG)                                                                          | Arg97 (NH2) | 2.70       | 116                    | SC-SC               |
| Val70 <sub>B</sub> (O)                                                                           | Gln94 (NE2) | 2.87       | 94                     | MC-SC               |
| Ser72 <sub>B</sub> (OG)                                                                          | Gln94 (NE2) | 3.10       | 117                    | SC-SC               |
| Tyr103 <sub>A</sub> (OH)                                                                         | Asp84 (OD2) | 2.76       | 113                    | SC-SC               |

  

| H-bonds between BMP-2 and ActR-IIB <sub>ECD</sub> in the ternary complex (1:2:2)                 |             |            |                        |                     |
|--------------------------------------------------------------------------------------------------|-------------|------------|------------------------|---------------------|
| BMP-2L100K/N102D:(BMPR-IA <sub>ECD</sub> ) <sub>2</sub> :(ActR-IIB <sub>ECD</sub> ) <sub>2</sub> |             |            |                        |                     |
| BMP-2                                                                                            | ActR-IIB    | Distance Å | Angle NOC <sup>a</sup> | H-bond <sup>b</sup> |
| Ser88 (OG)                                                                                       | Leu61 (N)   | 2.90       | 128                    | SC-MC               |
| Glu96 (O)                                                                                        | Arg46 (NH2) | 3.24       | 161                    | MC-SC               |
| Val98 (O)                                                                                        | Lys56 (NZ)  | 3.02       | 145                    | MC-SC               |

- a) N, O, C are the donor-acceptor atoms; from general statistics this angle is  $149^\circ \pm 15^\circ$  for MC-MC hydrogen bonds and  $129^\circ \pm 18^\circ$  for SC-MC and SC-SC H-bonds;
- b) MC (main chain) and SC (side chain) donor/acceptor atoms;
