# Supplementary material for: A silent H-bond can be mutationally activated for high-affinity interaction of BMP-2 and activin type IIB receptor
Source: PubMed Central journal article supplement (PMC1802081; doi:10.1186/1472-6807-7-6), 2007-02-12
Supplement: 1472-6807-7-6-S6.pdf [file 1472-6807-7-6-S6.pdf]

**MAD data for the ternary complex (1:1:1) BMP-2:BMPR-IA<sub>ECD</sub>:ActR-IIB<sub>ECD</sub>**

| Crystal                                                            | BMP-2:BMPR-IA <sub>ECD</sub> (F35M, L73M, L95M):ActR-IIB <sub>ECD</sub> |                                                |                                                       |
|--------------------------------------------------------------------|-------------------------------------------------------------------------|------------------------------------------------|-------------------------------------------------------|
| Space group                                                        | P2 <sub>1</sub> 2 <sub>1</sub> 2 <sub>1</sub>                           |                                                |                                                       |
| Cell constants                                                     | a = 64.36Å, b = 65.68Å, c = 113.97Å<br>α = β = γ = 90°                  |                                                |                                                       |
| Wavelength                                                         | Se-Met (λ.1)<br>0.9799 Å                                                | Se-Met (λ.2)<br>0.9796 Å                       | Se-Met (λ.3)<br>0.9079 Å                              |
| Resolution (Å) <sup>a</sup>                                        | 30.0 – 2.75 Å<br>(2.90 – 2.75 Å)<br>λ.1 (inflection)                    | 30.0 – 2.75 Å<br>(2.90 – 2.75 Å)<br>λ.2 (peak) | 30.0 – 2.75 Å<br>(2.90 – 2.75 Å)<br>λ.3 (remote high) |
| Number of measured reflections <sup>b</sup>                        | 183773 (26598)                                                          | 185933 (26610)                                 | 188670 (27520)                                        |
| Number of unique reflections <sup>b</sup>                          | 13130 (1874)                                                            | 13134 (1872)                                   | 13137 (1879)                                          |
| Completeness                                                       | 99.9 (99.9)                                                             | 99.9 (99.9)                                    | 99.9 (99.9)                                           |
| Multiplicity                                                       | 14.0 (14.2)                                                             | 14.2 (14.2)                                    | 14.4 (14.9)                                           |
| R <sub>sym</sub> for all reflections <sup>c</sup><br><Intensity/σ> | 6.1 (16.6) %<br>38.3 (14.8)                                             | 7.1 (18.7) %<br>33.6 (13.2)                    | 6.7 (17.4) %<br>35.7 (14.8)                           |
| Phasing                                                            | 7 out of 10 Se-sites identified                                         |                                                |                                                       |
| R <sub>cullis</sub> (a/c) <sup>d</sup>                             | 0.469/0.401                                                             | 0.586/0.590                                    | -                                                     |
| R <sub>Kraut</sub> <sup>e</sup>                                    | 0.025                                                                   | 0.022                                          | 0.039                                                 |
| Phasing power (a/c) <sup>f</sup>                                   | 3.07/3.30                                                               | 2.26/2.31                                      | 1.50/1.72                                             |
| Figure of merit after DM                                           |                                                                         | 0.75                                           |                                                       |

- a) Numbers in parentheses indicate highest resolution shell  
b) Cut-off for reflections  $F > 0\sigma$   
c)  $R_{sym} = \sum_{hkl} |I_{hkl} - \langle I_{hkl} \rangle| / \sum_{hkl} \langle I_{hkl} \rangle$  where  $\langle I_{hkl} \rangle$  is the mean intensity of symmetry related observations of a unique reflection  
d)  $R_{cullis} = \langle \text{phase-integrated lack of closure} \rangle / \langle F_{PH} - F_P \rangle$   
(a/c) denotes acentric and centric reflections  
e)  $R_{Kraut} = \sum (|(F_P + F_H) - F_{PH}|) / \sum |F_P|$   
f) Phasing power =  $(\sqrt{|F_H|^2}) / (\sqrt{|\text{lack-of-closure}^2|})$ , (a/c) denotes acentric and centric reflections
